# Supplementary material
Source: PubMed Central journal article supplement (PMC5635934)
Supplement: pnas.201714361SI.pdf [file pnas.201714361SI.pdf]

# Supporting Information

Wickner et al. 10.1073/pnas.1714361114

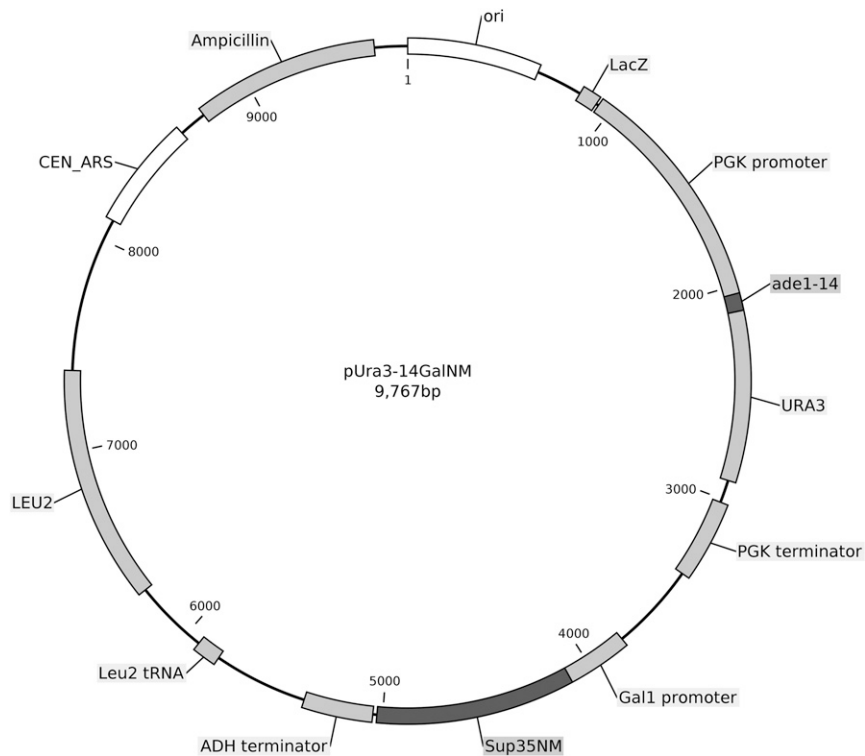

Fig. S1. Structure of p1520 carrying the *ura3-14* gene and *SUP35NM* controlled by the *GAL1* promoter.

**Table S1. Strains, plasmids, and primers**

| Strains, plasmids, and oligonucleotides | Description                                                                                                                                             | Source    |
|-----------------------------------------|---------------------------------------------------------------------------------------------------------------------------------------------------------|-----------|
| <b>Strains</b>                          |                                                                                                                                                         |           |
| BY4741/4812/4445                        | <i>MAT<math>\alpha</math> his3 ura3 leu2 met15</i> [PIN+][psi-]                                                                                         | (69)      |
| BY4742/4813/4729                        | <i>MAT<math>\alpha</math> his3 ura3 leu2 lys2</i> [PIN+] [psi-]                                                                                         | (69)      |
| 4457                                    | <i>MAT<math>\alpha</math> trp1 ura2 leu2 kar1-1</i> [PIN+]                                                                                              |           |
| PB7                                     | <i>MAT<math>\alpha</math> siw14::kanMX his3 ura3 leu2 met15</i> [PIN+][PSI+ss] p1520                                                                    | This work |
| PB14                                    | <i>MAT<math>\alpha</math> siw14::kanMX his3 ura3 leu2 met15</i> [PIN+][PSI+ss] p1520                                                                    | This work |
| 5255                                    | PB7 cured of [PSI+] and [PIN+], and [PIN+] then restored from strain 4457                                                                               | This work |
| 5335                                    | 4813 <i>kar1<math>\Delta</math>15</i>                                                                                                                   | This work |
| 5337                                    | 5335 <i>siw14::kanMX</i>                                                                                                                                | This work |
| 5355                                    | 5255 with a new [PSI+ss15]                                                                                                                              | This work |
| 5402                                    | <i>MAT<math>\alpha</math> ade1-14 kar1<math>\Delta</math>15 his3 ura3 leu2 lys2</i> p1520                                                               | This work |
| 5261                                    | PB14 cured of [PSI+] and [PIN+], and [PIN+] then restored from strain 4457                                                                              | This work |
| 5408                                    | BY4741 <i>arg82::kanMX</i>                                                                                                                              |           |
| 5477                                    | BY4742 <i>arg82::kanMX</i>                                                                                                                              |           |
| 5478                                    | 5477 p1520 p1574 [PIN+] [psi-]                                                                                                                          | This work |
| 5506                                    | <i>MAT<math>\alpha</math> ade1-14 kar1<math>\Delta</math>15 his3 ura3 leu2 met15</i> p1520 pRS313                                                       | This work |
| 4866                                    | BY4741 <i>gal7::kanMX</i>                                                                                                                               |           |
| 5498, 5505                              | <i>MAT<math>\alpha</math> ade1-14 kar1<math>\Delta</math>15 siw14::kanMX his3 ura3 leu2 met15</i> p1520 pRS313 $\rho^{\circ}$                           | This work |
| 5503, 5492                              | <i>MAT<math>\alpha</math> ipk1::kanMX his3 ura3 leu2 met15</i> p1520 pRS313 $\rho^{\circ}$                                                              |           |
| 5502, 5495                              | <i>MAT<math>\alpha</math> kcs1::kanMX his3 ura3 leu2 met15</i> p1520 pRS313 $\rho^{\circ}$                                                              |           |
| 5504, 5496                              | <i>MAT<math>\alpha</math> vip1::kanMX his3 ura3 leu2 met15</i> p1520 pRS313 $\rho^{\circ}$                                                              |           |
| 5494                                    | <i>MAT<math>\alpha</math> ddp1::kanMX his3 ura3 leu2 met15</i> p1520 pRS313 $\rho^{\circ}$                                                              |           |
| 5538                                    | <i>MAT<math>\alpha</math> ipk1::kanMX kcs1::kanMX his3 ura3 leu2 met15 kar1<math>\Delta</math>15</i> p1520 pRS313 $\rho^{\circ}$                        | This work |
| 5536                                    | <i>MAT<math>\alpha</math> ipk1::kanMX kcs1::kanMX his3 ura3 leu2 met15 kar1<math>\Delta</math>15</i> p1520 pRS313 $\rho^{\circ}$                        | This work |
| 5526                                    | <i>MAT<math>\alpha</math> plc1::kanMX his3 ura3 leu2 met15</i> p1520 pRS313 $\rho^{\circ}$                                                              |           |
| 5525                                    | <i>MAT<math>\alpha</math> kcs1::kanMX ddp1::kanMX his3 ura3 leu2 met15 kar1<math>\Delta</math>15</i> p1520 pRS313 $\rho^{\circ}$                        | This work |
| 5440                                    | <i>MAT<math>\alpha</math> vipk1::kanMX kcs1::kanMX his3 ura3 leu2 met15</i> p1520 pRS313 $\rho^{\circ}$                                                 | This work |
| 5522                                    | <i>MAT<math>\alpha</math> vip1::kanMX siw14::kanMX ade1-14 his3 ura3 leu2 met15</i> p1520 pRS313 $\rho^{\circ}$                                         | This work |
| 5497                                    | <i>MAT<math>\alpha</math> kcs1::kanMX siw14::kanMX ade1-14 his3 ura3 leu2 met15</i> p1520 pRS313 $\rho^{\circ}$                                         | This work |
| 5457                                    | <i>MAT<math>\alpha</math> ddp1::kanMX siw14::kanMX ade1-14 his3 ura3 leu2 met15</i> p1520 pRS313 $\rho^{\circ}$                                         | This work |
| 5197-2D                                 | <i>MAT<math>\alpha</math> vip1::kanMX ipk1::kanMX leu2 ura3 his3 lys2</i>                                                                               | This work |
| 5197-5B                                 | <i>MAT<math>\alpha</math> vip1::kanMX ipk1::kanMX leu2 ura3 his3 lys2</i>                                                                               | This work |
| 5197-7B                                 | <i>MAT<math>\alpha</math> vip1::kanMX ipk1::kanMX leu2 ura3 his3 lys2 met15</i>                                                                         | This work |
| 74D-694                                 | <i>MAT<math>\alpha</math> ade1-14 trp1-289 his3-200 ura3-52 leu2<sup>+</sup></i> [PIN+][psi-]                                                           | (24)      |
| BY241                                   | <i>MAT<math>\alpha</math> leu2 trp1 ura3 P<sub>DAL5</sub>:ADE2 P<sub>DAL5</sub>:CAN1 kar1</i>                                                           | (11)      |
| 5560                                    | <i>MAT<math>\alpha</math> leu2 trp1 ura3 P<sub>DAL5</sub>:ADE2 P<sub>DAL5</sub>:CAN1 kar1 arg82::kanMX lys2</i>                                         | This work |
| 779-6A                                  | <i>MAT<math>\alpha</math> ade2-1 SUQ5 ura3 leu2 trp1 his3</i> [psi-] or [PSI+]                                                                          | (39)      |
| AG571                                   | <i>MAT<math>\alpha</math> ade2-1 SUQ5 ura3 leu2 trp1 his3</i> [pin-] [psi-] $\rho^{\circ}$ , isogenic with 779-6A                                       | (29)      |
| AG537                                   | <i>MAT<math>\alpha</math> ade2-1 SUQ5 ura3 leu2 trp1 his3 hsp104<sup>T160M</sup> loxP-URA3-loxP</i> [pin-] [psi-] $\rho^{\circ}$ , isogenic with 779-6A | (29)      |
| 5565                                    | AG571 <i>lys2 arg82<math>\Delta</math> pLYS2-ARG82</i> [PSI+1] <i>HSP104</i>                                                                            | This work |
| 5571                                    | AG537 <i>lys2 arg82<math>\Delta</math> pLYS2-ARG82</i> [PSI+1] <i>hsp104<sup>T160M</sup></i>                                                            | This work |
| 5201-7B                                 | <i>MAT<math>\alpha</math> met15 lys2 leu2 his3 ura3 arg82::kanMX hsp26::kanMX</i>                                                                       | This work |
| <b>Plasmids</b>                         |                                                                                                                                                         |           |
| p1520                                   | <i>LEU2 CEN ura3-14 GAL1 promoter-SUP35NM</i>                                                                                                           | This work |
| p1574                                   | pRS317-ARG82 promoter-ARG82 <i>LYS2 CEN</i>                                                                                                             | This work |
| pH773                                   | <i>CEN HIS3 GAL1</i> promoter                                                                                                                           | H.K.E.    |
| pH321                                   | pRS313 ( <i>CEN HIS3</i> ) with the HindIII and NheI sites removed from <i>HIS3</i>                                                                     | H.K.E.    |
| p1569                                   | pH321 with <i>SIW14</i> + 500 bp upstream of the ORF                                                                                                    | This work |
| pSC4                                    | <i>CEN LEU2 Renilla luciferase UAA firefly luciferase</i>                                                                                               | (46)      |
| pRS315- <i>SIW14</i>                    | <i>SIW14</i> with 500 bp of upstream sequence inserted as BamHI-Sall fragment in pRS315                                                                 | This work |
| p <i>SIW14</i> p1569                    | <i>SIW14</i> with 500 bp of upstream sequence as BamHI-Sall fragment from pRS315- <i>SIW14</i> inserted in pH321                                        | This work |
| p1534                                   | pH773 expressing the <i>SIW14</i> orf from the <i>GAL1</i> promoter                                                                                     | This work |
| pSL1066                                 | <i>CEN URA3 CUP1</i> promoter-SUP35NM-GFP                                                                                                               | (74)      |
| <b>Oligonucleotides</b>                 |                                                                                                                                                         |           |
| U1                                      | GATGTCCACGAGGTCTCT                                                                                                                                      | (42)      |
| KanB                                    | CTGCAGCGAGGAGCCGTAAT                                                                                                                                    | (42)      |
| 978                                     | CCCAAGCTTGAGACTAGTTACGTAAAGGTAATCAC                                                                                                                     | This work |
| 979                                     | CCCGGATCCAGCGCATTGAGTCTTGC                                                                                                                              | This work |
| 1092                                    | CCTGAGGGCCCGCTGGGACTAATTGG                                                                                                                              | This work |
| 1093                                    | CCCGAGCTCGGTAACTTCACCTCTCAATATATCTAGAATTTC                                                                                                              | This work |

## Other Supporting Information Files

[Dataset S1 \(TXT\)](#)
